# Supplementary material for: Sustainably closed loop recycling of hierarchically porous polymer microbeads for efficient removal of cationic dyes
Source: Royal Society of Chemistry journal article supplement (doi:10.1039/d1ew00811k), 2021-12-24
Supplement: d1ew00811k1.pdf [file d1ew00811k1.pdf]

1  
2  
3  
4  
5  
6  
7  
8  
9  
10  
11  
12  
13  
14  
15  
16  
17  
18  
19  
20  
21  
22

## SUPPORTING INFORMATION

### Sustainably closed loop recycling of hierarchically porous polymer microbeads for efficient removal of cationic dyes

Jikang Li<sup>a#</sup>, Qin Yang<sup>a#</sup>, Sheng Chen<sup>a</sup>, Kerry McPhedran<sup>b,c</sup>, Yingchun Gu<sup>a</sup>, Rongfu Huang<sup>d\*</sup>, Bin Yan<sup>a\*</sup>

<sup>a</sup> National Engineering Laboratory for Clean Technology of Leather Manufacture, College of Biomass Science and Engineering, Sichuan University, Chengdu, 610065, China

<sup>b</sup> Department of Civil, Geological & Environmental Engineering, College of Engineering, University of Saskatchewan, Saskatoon, SK, Canada

<sup>c</sup> Global Institute for Water Security, University of Saskatchewan, Saskatoon, SK, Canada

<sup>d</sup> MOE Key Laboratory of Deep Earth Science and Engineering, College of Architecture and Environment, Sichuan University, Chengdu, Sichuan 610065, China

23 **Section S.1** Standard curves of three cationic dyes

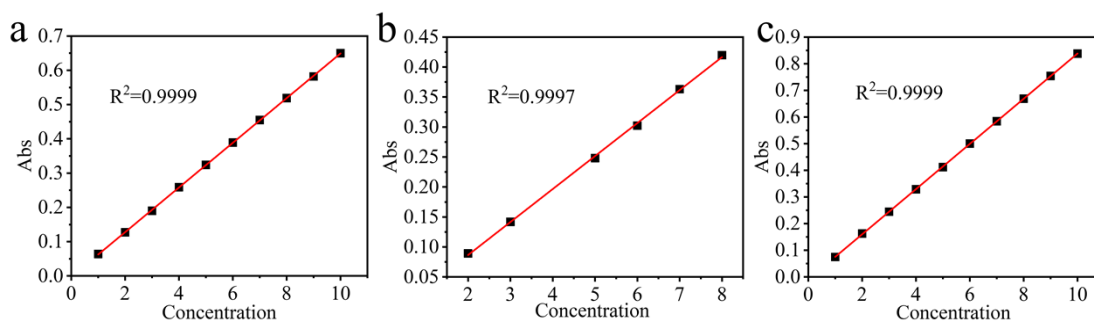

24

25 Fig. S1 Standard curve of cationic dyes: (a) Methylene blue; (b) Malachite green; (c) Methyl violet 2B.

26

27 The equation obtained by curve fitting.

28 Methylene blue:  $A=0.0652c-0.0027$  (1)

29 Malachite green:  $A=0.055c-0.0234$  (2)

30 Methyl violet 2B:  $A=0.0848c-0.0094$  (3)

31 A is the absorbance of the solution, and C(mg/L) is the concentration of the solution.

32

33

34

35

36

37

38

39

40

41

42

43

44

45

46

47

48

49

50

51

52

53

54

55

56

57

58

59

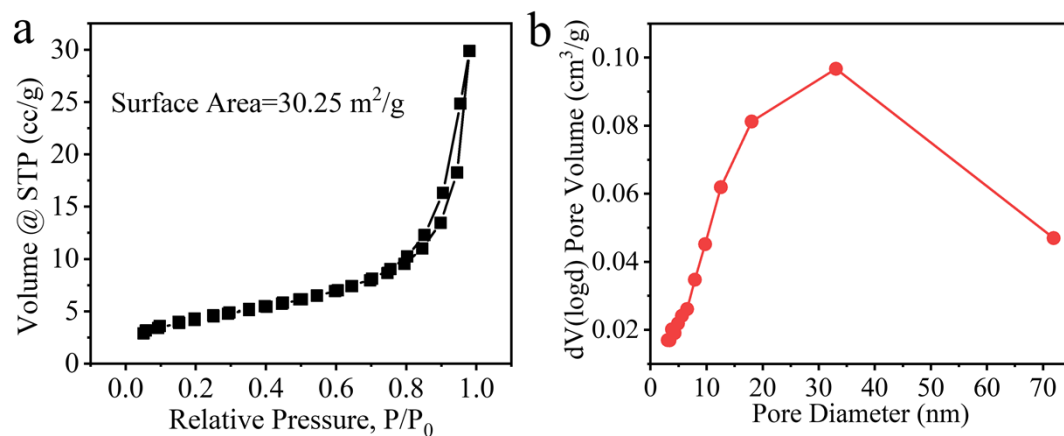

60

61 **Fig. S2.** (a) Nitrogen adsorption–desorption isotherm obtained for PCP-IDA adsorbents; (b) Pore

62 size Distribution of PCP-IDA.

63

64

65

66

67

68

69

70

71

72

73

74

75

76

77

78

79

80

81

82

83

84

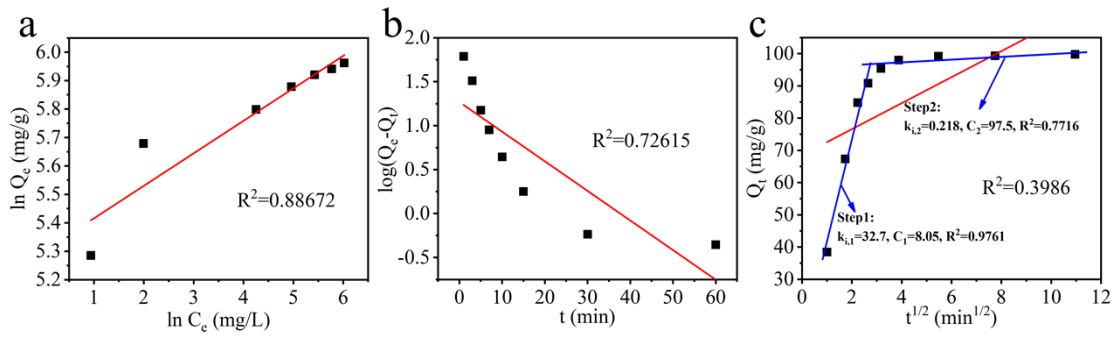

85

86 **Fig. S3.** (a) Freundlich fitting curve in isothermal adsorption model. (b) The fitting result of the pseudo-  
 87 first-order model; (c) The fitting result of the intra-particle diffusion kinetic model.

88

89

90

91

92

93

94

95

96

97

98

99

100

101

102

103

104

105

106

107

108

109

110

111 **Table S1.** Estimated values of parameters for different kinetic models.

| Kinetic model            | Parameters                         |                                                          |         |
|--------------------------|------------------------------------|----------------------------------------------------------|---------|
| Pseudo-first-order       | $Q_e(\text{mg}\cdot\text{g}^{-1})$ | $k_1(\text{mg}\cdot\text{g}^{-1})$                       | $R^2$   |
|                          | 99.8                               | 0.776                                                    | 0.72615 |
| Pseudo-second-order      | $Q_e(\text{mg}\cdot\text{g}^{-1})$ | $k_2(\text{g}\cdot\text{mg}^{-1}\cdot\text{min}^{-1})$   | $R^2$   |
|                          | 101.01                             | 0.1077                                                   | 0.99988 |
| Intra-particle diffusion | $C(\text{mg}\cdot\text{g}^{-1})$   | $k_i(\text{mg}\cdot\text{g}^{-1}\cdot\text{min}^{-1/2})$ | $R^2$   |
|                          | 68.514                             | 4.0339                                                   | 0.39864 |

112

113

114

115

116

117

118

119

120

121

122

123

124

125

126

127

128

129

130

131

132

133

134

135

136

137

138

139

140

141

142

143

144 **Table S2.** Isothermal adsorption fitting curve data.

| Langmuir              |                       |                | Freundlich |                       |                |
|-----------------------|-----------------------|----------------|------------|-----------------------|----------------|
| Q <sub>m</sub> (mg/g) | K <sub>L</sub> (L/mg) | R <sup>2</sup> | n          | K <sub>F</sub> (L/mg) | R <sup>2</sup> |
| 384.62                | 0.1354                | 0.99897        | 8.7489     | 200.68                | 0.88672        |

145

146

147

148

149

150

151

152

153

154

155

156

157

158

159

160

161

162

163

164

165

166

167

168

169

170

171

172

173

174

175

176

177

178

179

180

181

182

183 **Table S3.** The comparison of the adsorption capacity of PCP-IDA adsorbent with other reported  
 184 adsorbents with similar structure or size.

| Adsorbent/mass                                                           | MB concentration/<br>volume | pH  | Temperature      | Adsorption capacity (mg/g)             | Kinetic (min) | References   |
|--------------------------------------------------------------------------|-----------------------------|-----|------------------|----------------------------------------|---------------|--------------|
| Nanocomposites poly(GDMA)/MCM-41/20 mg                                   | 40 mg/L<br>40 mL            | 6   | Room temperature | MB: 111.11                             | 20            | 1            |
| MAA/GMA-g-PET fibers/100 mg                                              | 40 mg/L<br>25mL             | 10  | 298K             | MB: 52.1                               | 60            | 2            |
| Cell-g-AASO3H-co-GMA/50 mg                                               | 20 mg/L<br>50 mL            | 7   | 298K             | MG: 46.23<br>MV: 53.53                 | 120           | 3            |
| Poly GMA/DVB/200 mg                                                      | 5 mg/L<br>25 mL             | 7   | Room temperature | MG: 13.6                               | 50            | 4            |
| MCTSms-PMAA/4.5 mg                                                       | 200 mg/L<br>40 mL           | 12  | Room temperature | MB: 211.11                             | 100           | 5            |
| ATP@CCS/7.5 mg                                                           | 200 mg/L<br>20 mL           | 10  | 298.15K          | MB: 215.73                             | 120           | 6            |
| PES/GO porous particles/5 mg                                             | 150 $\mu$ mol/L<br>20mL     | 7   | 303K             | MB: 62.5                               | 3600          | 7            |
| UiO-66/MIL-101(Fe)/10 mg                                                 | 50 mg/L<br>20mL             | 9   | 298K             | MB: 448.71                             | 30            | 8            |
| A/ $\gamma$ -Fe <sub>2</sub> O <sub>3</sub> /f-CNT composite beads/50 mg | 230 mg/L<br>50 mL           | 5.2 | 298K             | MB: 396.7                              | 2880          | 9            |
| MPGB biosorbent/50 mg                                                    | 50 mg/L<br>100mL            | 7   | 293K             | MB: 231.5                              | 60            | 10           |
| P(G-E)@IDA/10 mg                                                         | 100 mg/L<br>10 mL           | 7   | 298K             | MB: 384.62<br>MG: 333.33<br>MV: 322.58 | 15            | In this work |

185

186

187

188

189

190

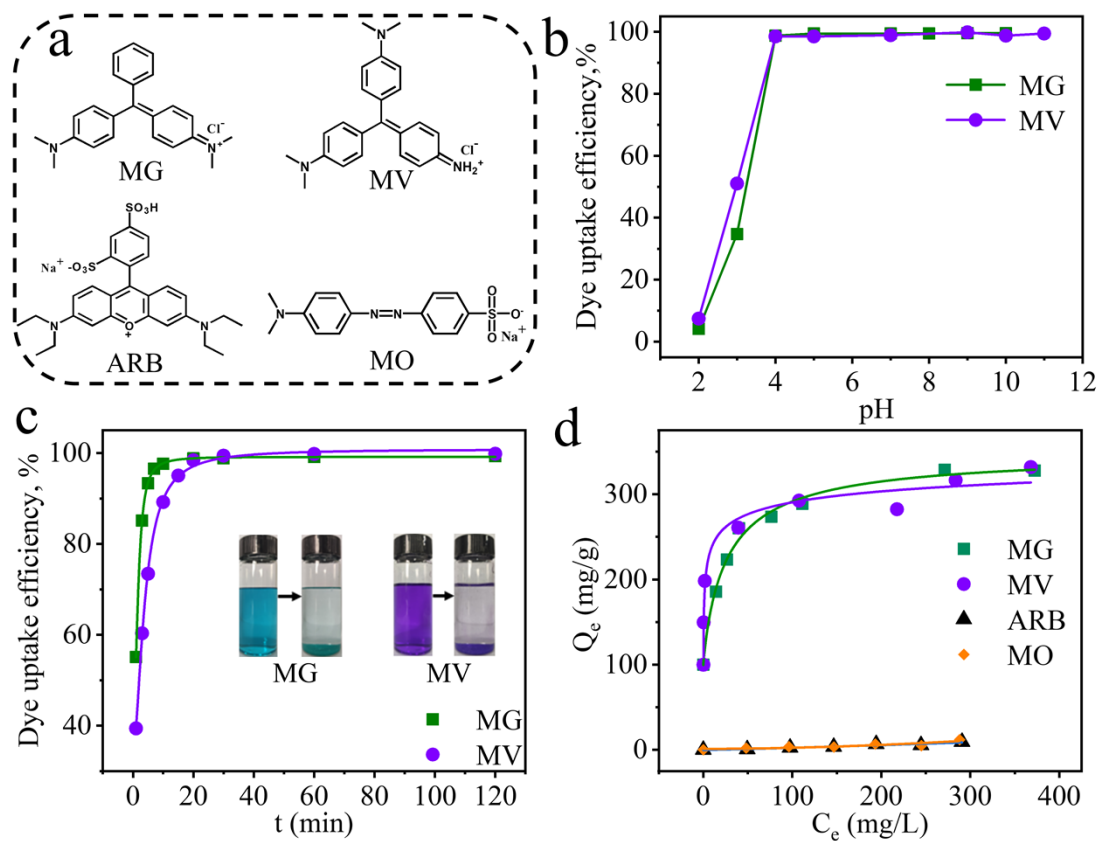

191

192 **Fig. S4.** (a) The chemical structure of MG, MV, ARB and MO dyes; (b) Effect of initial PH of dye

193 solution on adsorption; (c) Rapid adsorption of MG and MV dyes; (d) The equilibrium adsorption

194 capacity of four dyes by PCP-IDA adsorbent.

195

196

197

198

199

200

201

202

203

204

205

206

207

208

209

210

211



212

213 **Section S.2** The related models and parameters of PCP-IDA adsorbent for MG and MV dye adsorption  
214 were fitted.

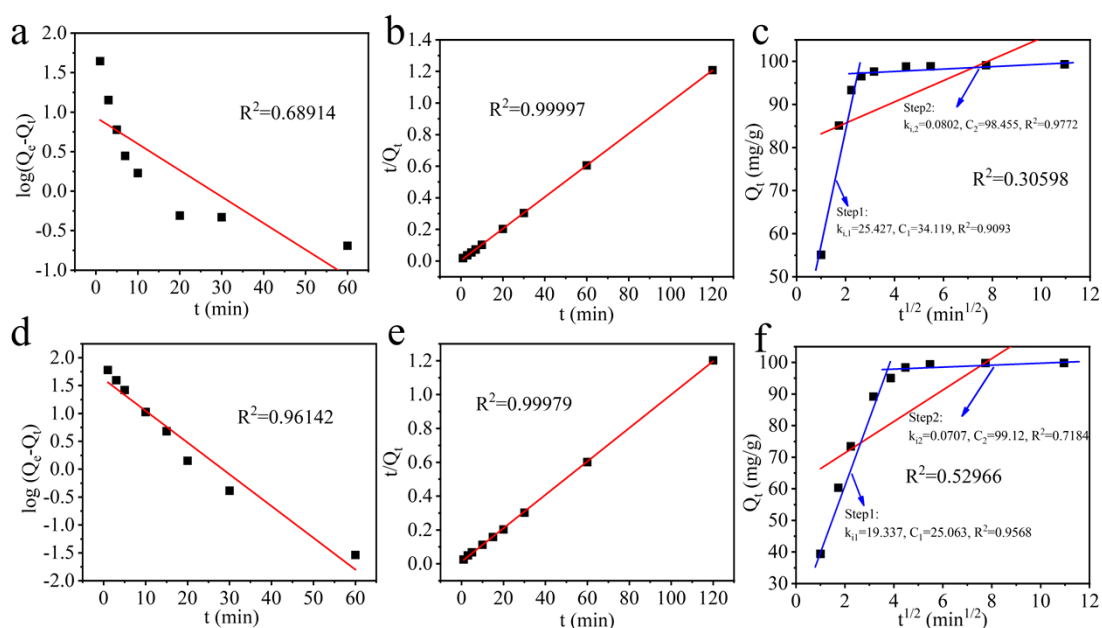

215

216 **Fig. S5.** (a) Pseudo-first-order model of MG; (b) Pseudo-second-order model of MG; (c) Intra-particle  
217 diffusion model of MG; (d) Pseudo-first-order model of MV; (e) Pseudo-second-order model of MV; (f)  
218 Intra-particle diffusion model of MV.

219

220

221

222

223

224

225

226

227

228

229

230

231

232

233

234

235

236

237

238

239

240

241 **Table S4.** Estimated values of parameters for different kinetic models.

| Dye   | Kinetic model               | Parameters                         |                                                          |         |
|-------|-----------------------------|------------------------------------|----------------------------------------------------------|---------|
| MG    | Pseudo-first-order          | $Q_c(\text{mg}\cdot\text{g}^{-1})$ | $k_1(\text{mg}\cdot\text{g}^{-1})$                       | $R^2$   |
|       |                             | 99.32                              | 0.0772                                                   | 0.68914 |
|       | Pseudo-second-order         | $Q_c(\text{mg}\cdot\text{g}^{-1})$ | $k_2(\text{g}\cdot\text{mg}^{-1}\cdot\text{min}^{-1})$   | $R^2$   |
|       |                             | 100                                | 0.025                                                    | 0.99997 |
|       | Intra-particle<br>diffusion | $C(\text{mg}\cdot\text{g}^{-1})$   | $k_i(\text{mg}\cdot\text{g}^{-1}\cdot\text{min}^{-1/2})$ | $R^2$   |
|       |                             | 78.891                             | 2.6216                                                   | 0.30598 |
| MV 2B | Pseudo-first-order          | $Q_c(\text{mg}\cdot\text{g}^{-1})$ | $k_1(\text{mg}\cdot\text{g}^{-1})$                       | $R^2$   |
|       |                             | 99.8361                            | 0.1313                                                   | 0.96142 |
|       | Pseudo-second-order         | $Q_c(\text{mg}\cdot\text{g}^{-1})$ | $k_2(\text{g}\cdot\text{mg}^{-1}\cdot\text{min}^{-1})$   | $R^2$   |
|       |                             | 101.01                             | 0.0076                                                   | 0.99979 |
|       | Intra-particle<br>diffusion | $C(\text{mg}\cdot\text{g}^{-1})$   | $k_i(\text{mg}\cdot\text{g}^{-1}\cdot\text{min}^{-1/2})$ | $R^2$   |
|       |                             | 61.408                             | 4.7948                                                   | 0.52966 |

242

243

244

245

246

247

248

249

250

251

252

253

254

255

256

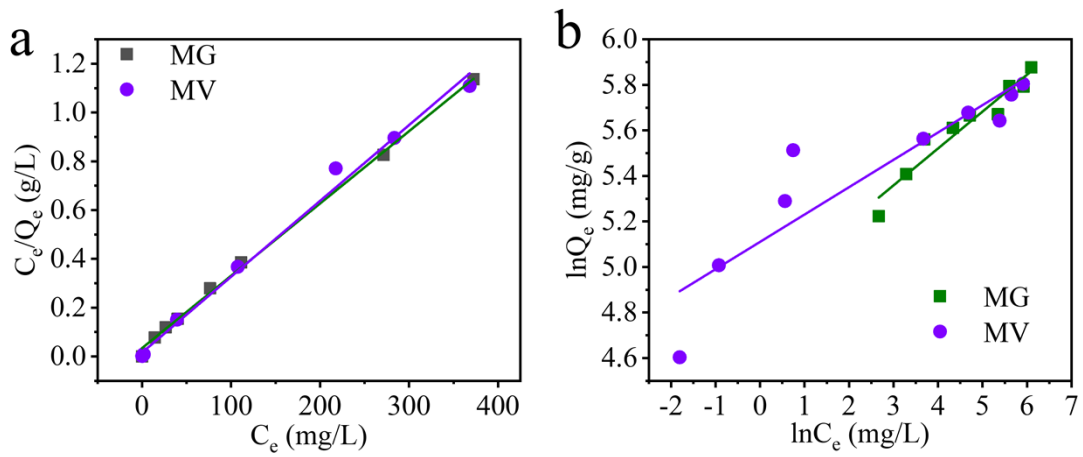

257

258 **Fig. S6.** The fitting model of isothermal adsorption of MG and MV dyes: (a) Langmuir model; (b)

259 Freundlich models.

260

261

262

263

264

265

266

267

268

269

270

271

272

273

274

275

276

277

278

279

280

281

282

283

284

285

286

287

288

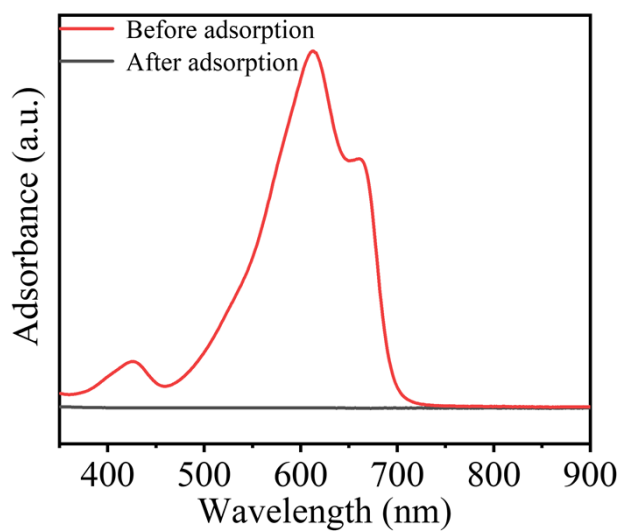

289

290 **Fig. S7.** Adsorption of mixed dye solution of MB, MG and MV.

291

292

293

294

295

296

297

298

299

300

301

302

303

304

305

306

307

308

309

310

311

312

313

314

315

316

317

318

319

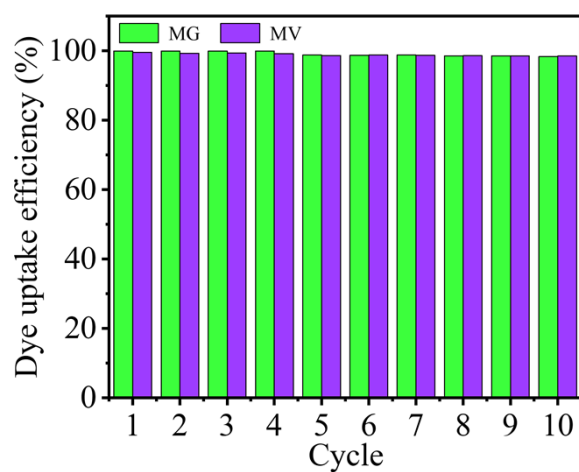

320

321 **Fig. S8.** The cyclic adsorption performance of PCP-IDA adsorbent for MG and MV dyes.

322

323

324

325

326

327

328

329

330

331

332

333

334

335

336

337

338

339

340

341

342

343

344

345

346

347

348

349

350

351

## 352 Reference

- 353 1. Z. Cherifi, B. Boukoussa, A. Mokhtar, M. Hachemaoui, F. Z. Zeggai, A. Zaoui, K. Bachari  
354 and R. Meghabar, Preparation of new nanocomposite poly(GDMA)/mesoporous silica and its  
355 adsorption behavior towards cationic dye, *React. Funct. Polym.*, 2020, **153**, 104611.
- 356 2. M. Arslan, Preparation and Application of Glycidyl Methacrylate and Methacrylic Acid  
357 Monomer Mixture-Grafted Poly(ethylene terephthalate) Fibers for Removal of Methylene  
358 Blue from Aqueous Solution, *J. Appl. Polym. Sci.*, 2011, **119**, 3034-3042.
- 359 3. R. K. Sharma and R. Kumar, Functionalized cellulose with hydroxyethyl methacrylate and  
360 glycidyl methacrylate for metal ions and dye adsorption applications, *Int. J. Biol. Macromol.*,  
361 2019, **134**, 704-721.
- 362 4. D. Husaain, M. Najam-ul-Haq, A. Saeed, F. Jabeen, M. Athar and M. N. Ashiq, Synthesis of  
363 poly GMA/DVB and its application for the removal of Malachite Green from aqueous  
364 medium by adsorption process, *Desalin. Water Treat.*, 2015, **53**, 2518-2528.
- 365 5. S. Y. Yu, J. L. Cui, H. Jiang, C. S. Zhong and J. Meng, Facile fabrication of functional  
366 chitosan microspheres and study on their effective cationic/anionic dyes removal from  
367 aqueous solution, *Int. J. Biol. Macromol.*, 2019, **134**, 830-837.
- 368 6. Q. Zhou, Q. Gao, W. J. Luo, C. J. Yan, Z. N. Ji and P. Duan, One-step synthesis of amino-  
369 functionalized attapulgite clay nanoparticles adsorbent by hydrothermal carbonization of  
370 chitosan for removal of methylene blue from wastewater, *Colloid Surf. A*, 2015, **470**, 248-257.
- 371 7. X. Zhang, C. Cheng, J. Zhao, L. Ma, S. D. Sun and C. S. Zhao, Polyethersulfone enwrapped  
372 graphene oxide porous particles for water treatment, *Chem. Eng. J.*, 2013, **215**, 72-81.
- 373 8. A. S. Eltaweil, E. M. Abd El-Monaem, G. M. El-Subriti, M. M. Abd El-Latif and A. M.  
374 Omer, Fabrication of UiO-66/MIL-101(Fe) binary MOF/carboxylated-GO composite for  
375 adsorptive removal of methylene blue dye from aqueous solutions, *RSC Adv.*, 2020, **10**,  
376 19008-19019.
- 377 9. S. Alvarez-Torrellas, M. Boutahala, N. Boukhalfa and M. Munoz, Effective Adsorption of  
378 Methylene Blue dye onto Magnetic Nanocomposites. Modeling and Reuse Studies, *Appl. Sci-  
379 Basel.*, 2019, **9**, 4563.
- 380 10. C. Li, X. J. Wang, D. Y. Meng and L. Zhou, Facile synthesis of low-cost magnetic biosorbent  
381 from peach gum polysaccharide for selective and efficient removal of cationic dyes, *Int. J.  
382 Biol. Macromol.*, 2018, **107**, 1871-1878.
- 383
